# Supplementary material
Source: PubMed Central journal article supplement (PMC7274203)

Figure 1C.

Myc (TCF21)

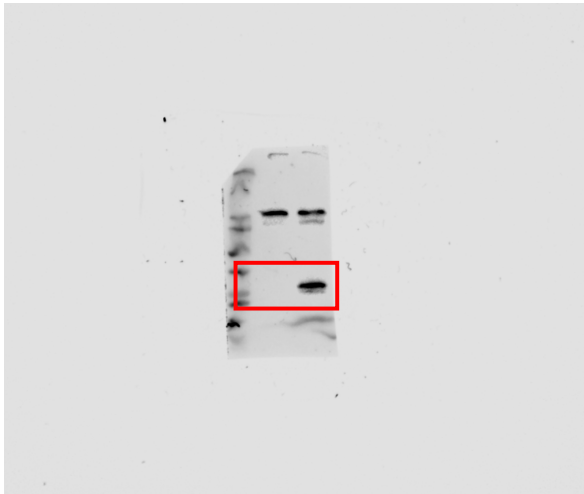

GAPDH

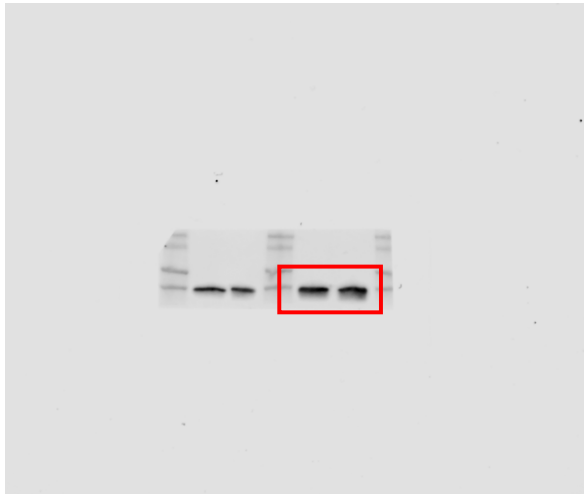

TCF21

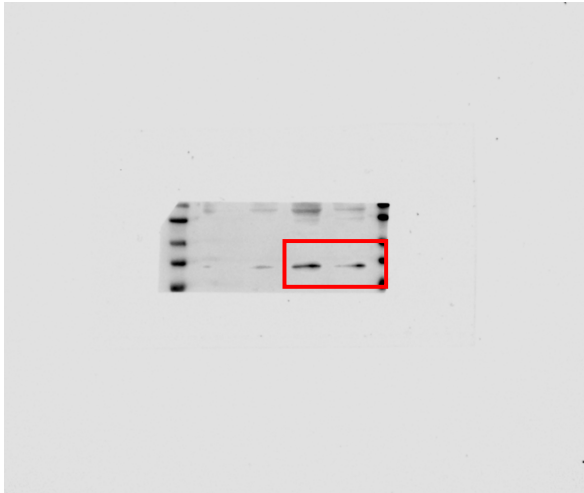

GAPDH

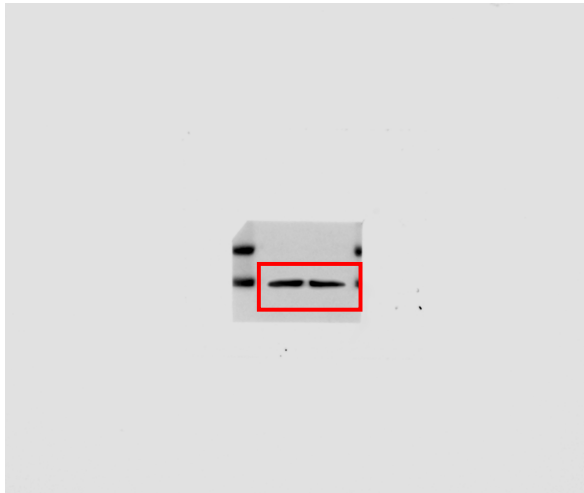

Figure 1E.

SM22 $\alpha$

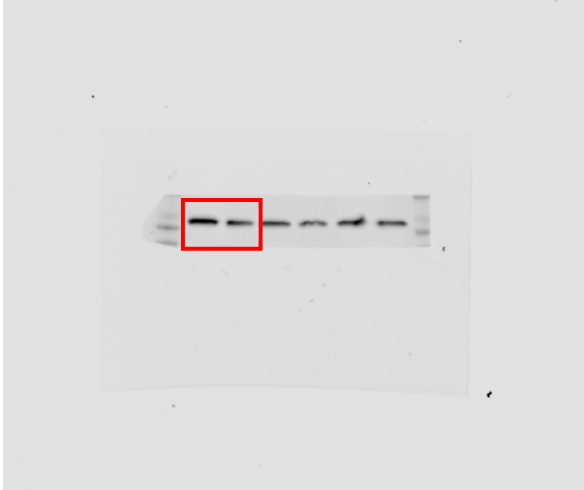

SM  $\alpha$ -actin

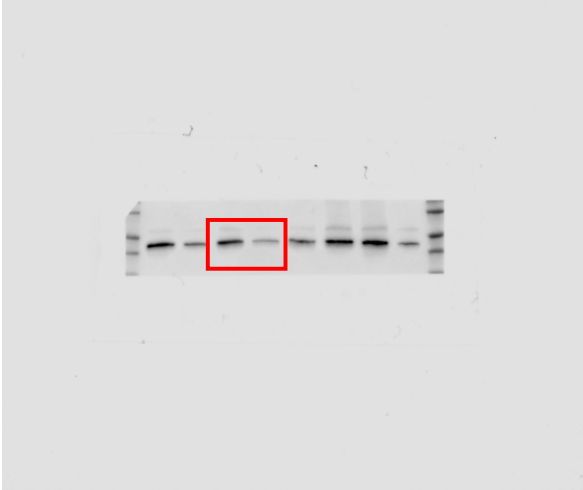

CNN1

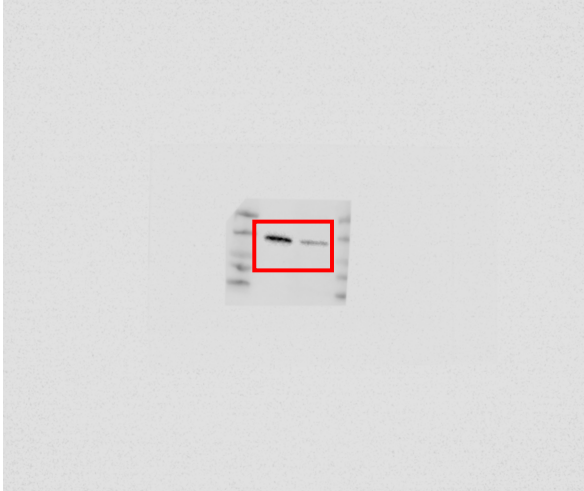

SM MHC

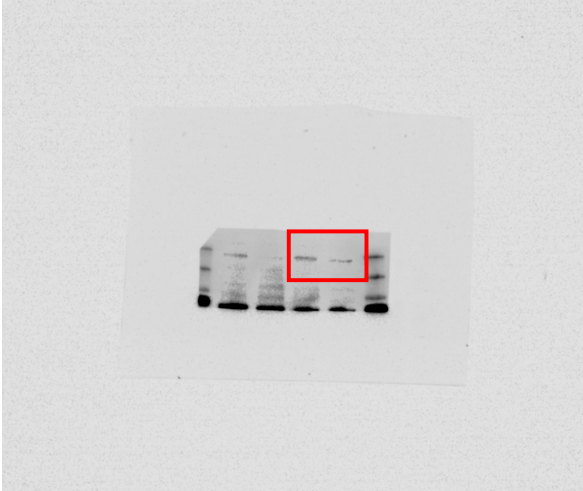

GAPDH

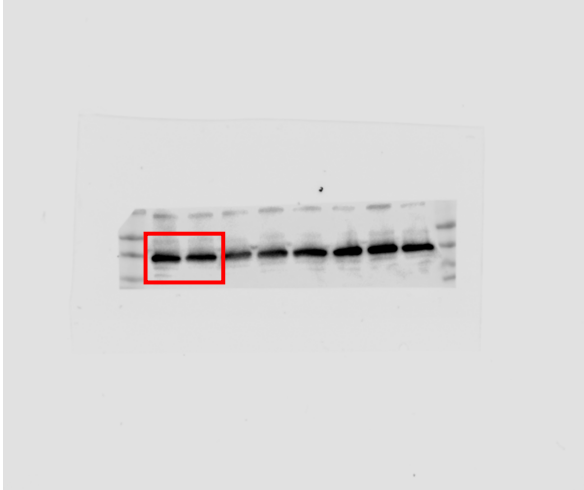

Figure 1G.

SM22 $\alpha$

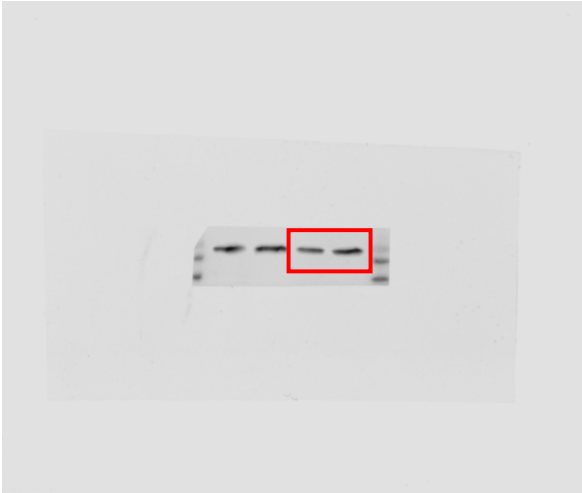

SM  $\alpha$ -actin

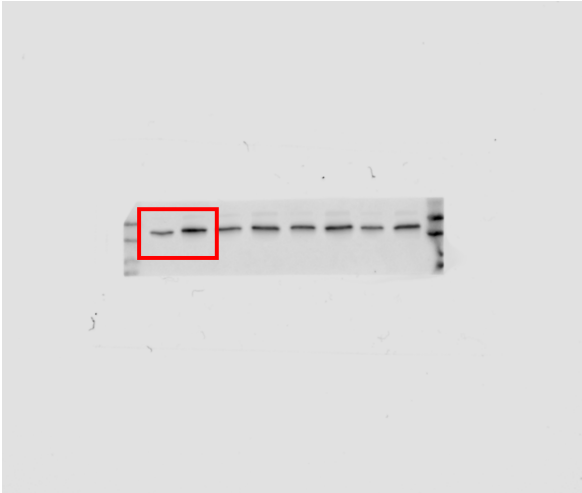

CNN1

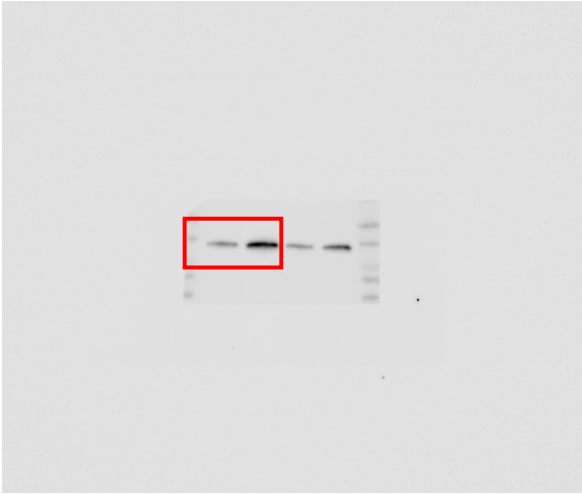

SM MHC

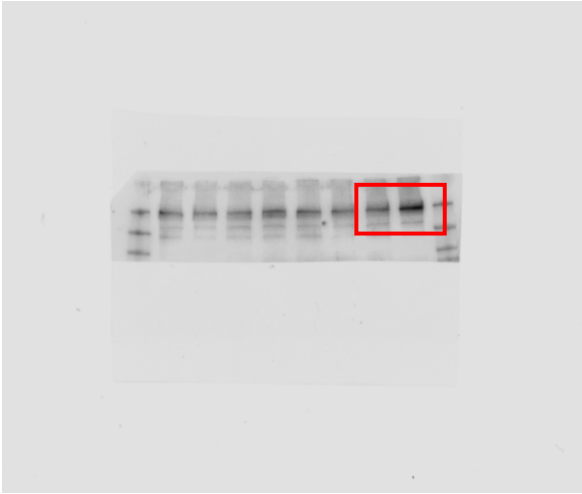

GAPDH

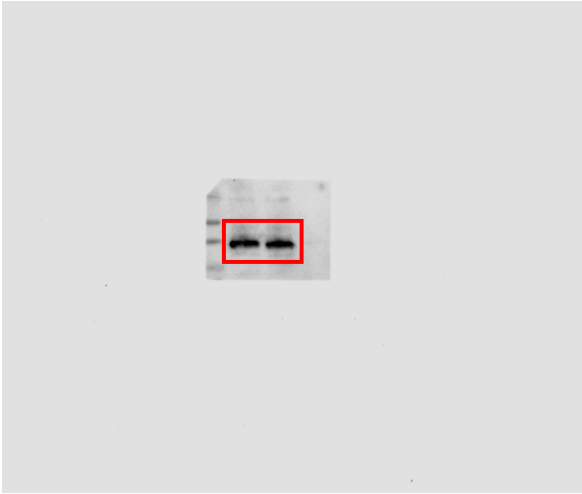

Figure 7A.

MYOCD

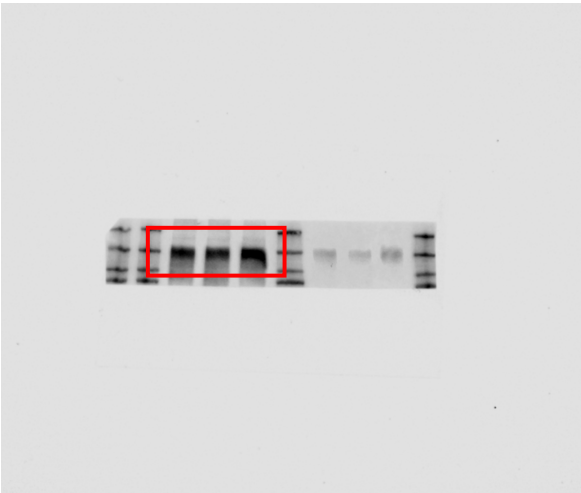

MYOCD

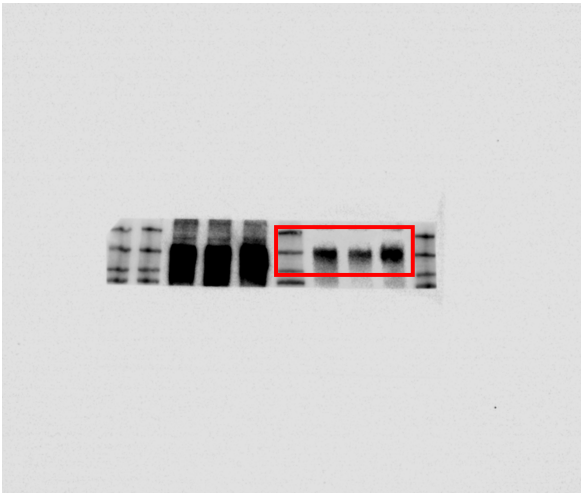

SRF

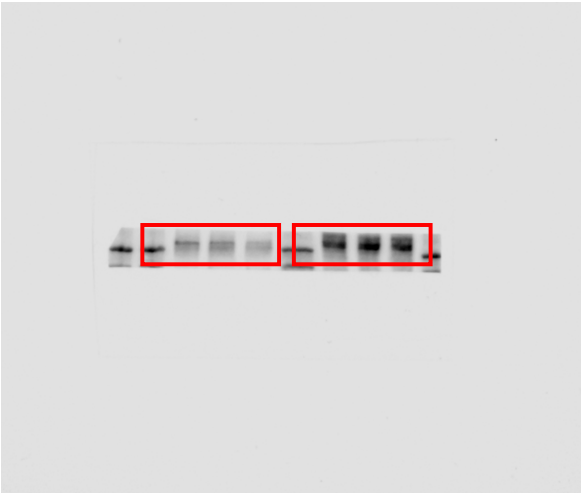

Myc

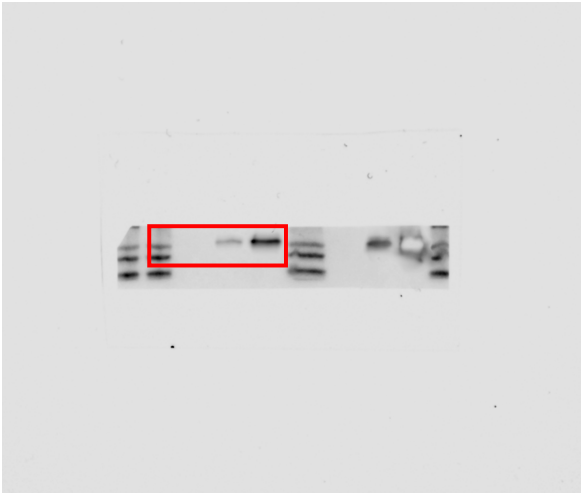

Figure 7B.

MYOCD

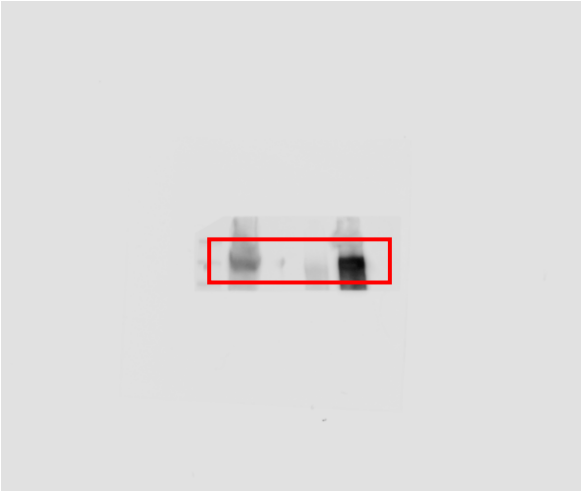

Myc

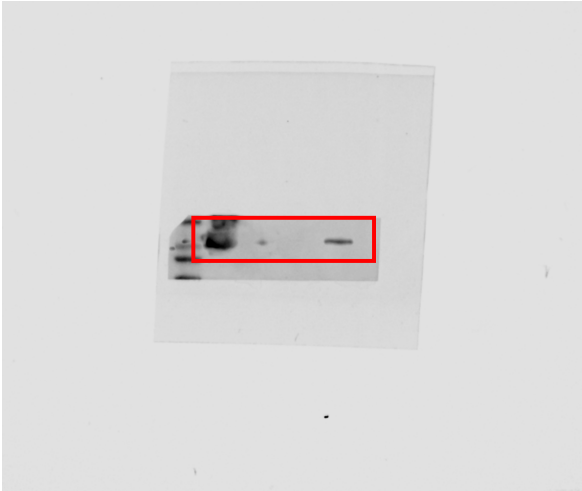

Figure 7C.

MYOCD

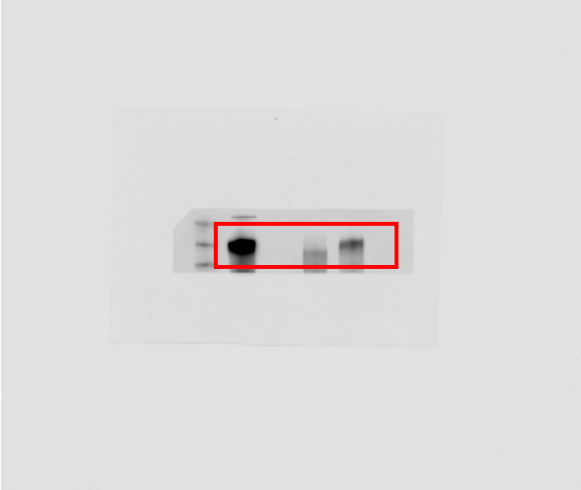

Myc

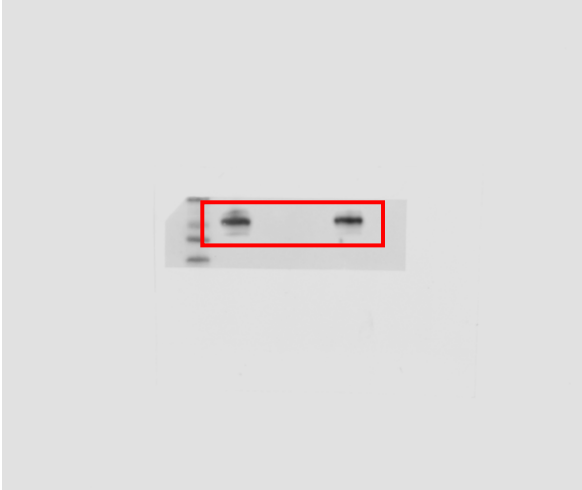

Figure 7D.

MYOCD

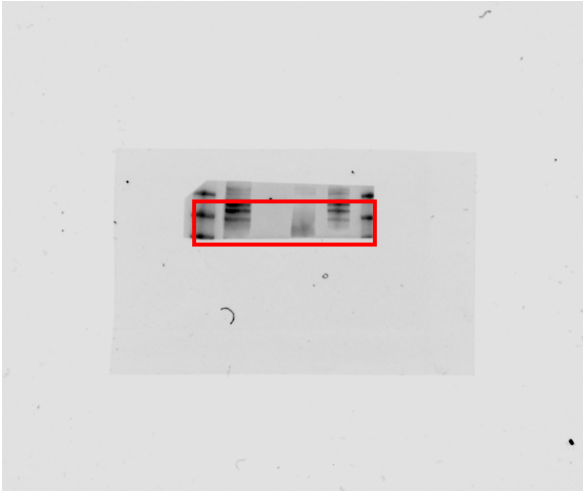

Myc

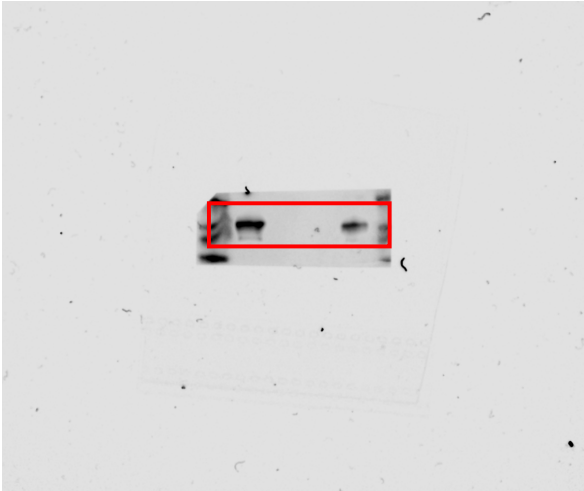

Figure 7E.

SRF

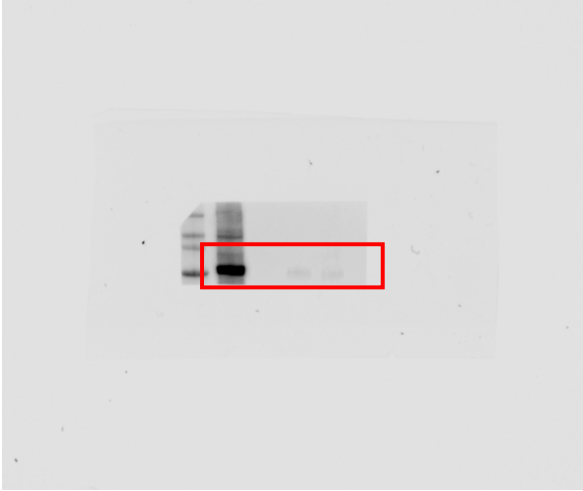

Myc

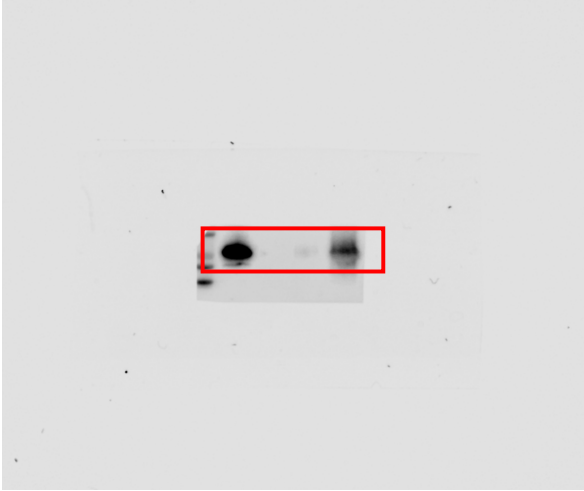

Suppl. Fig. 8A

MYOCD

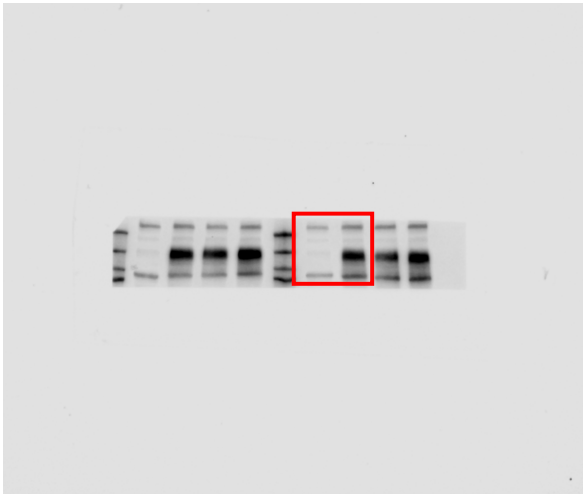

GAPDH

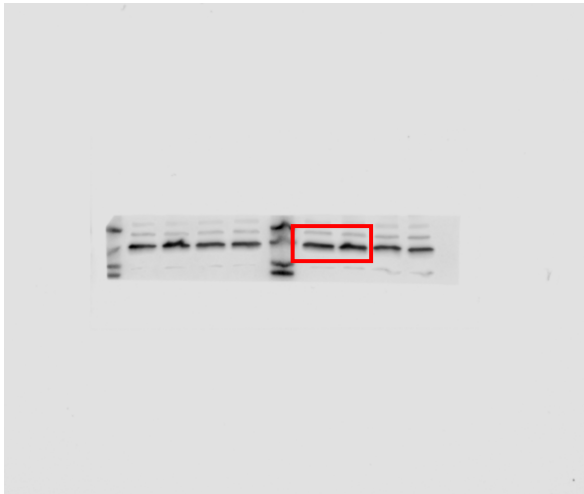

Suppl. Fig. 8B

MYOCD

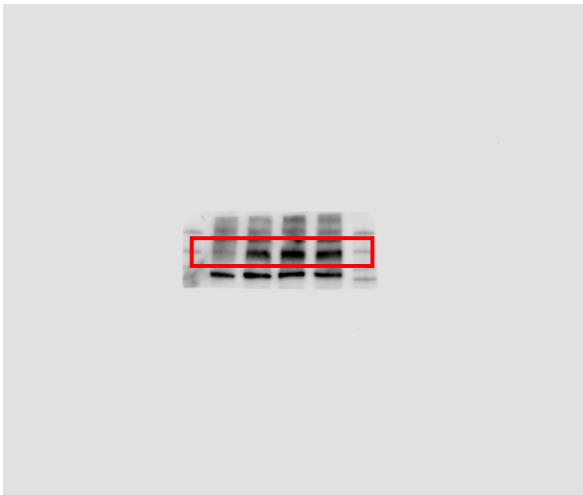

Myc

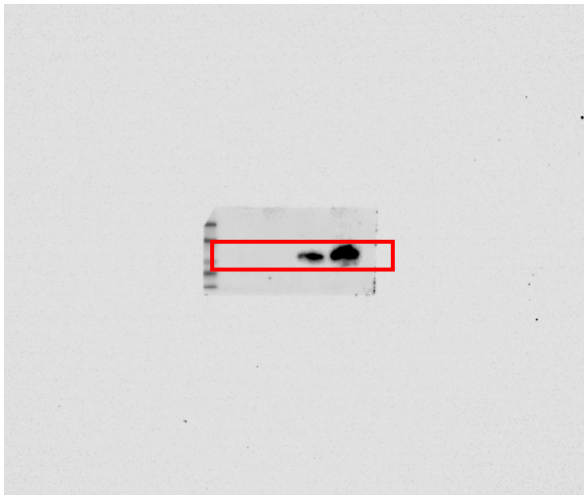

GAPDH

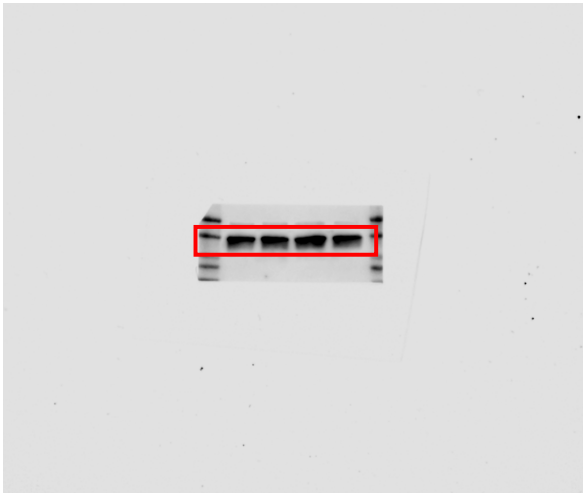

Supplement: NIHMS1549141-supplement-315968_Uncut_Full_GelBlots.pdf [file NIHMS1549141-supplement-315968_Uncut_Full_GelBlots.pdf]
